# Supplementary material for: AxiSEM: broadband 3-D seismic wavefields in axisymmetric media
Source: Copernicus journal article supplement (doi:10.5194/se-5-425-2014), 2014-06-04
Supplement: Supplementary file 1 [file se-5-425-2014-supplement.zip]

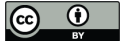

## *Supplement of*

## **AxiSEM: broadband 3-D seismic wavefields in axisymmetric media**

**T. Nissen-Meyer et al.**

*Correspondence to:* T. Nissen-Meyer ([tarjen@earth.ox.ac.uk](mailto:tarjen@earth.ox.ac.uk))

- Supplement-Cover-Letter.pdf
- Quake\_Italy.mov
